# Supplementary material for: The distinct biological implications of Asxl1 mutation and its roles in leukemogenesis revealed by a knock-in mouse model
Source: PubMed Central journal article supplement (PMC5504705; doi:10.1186/s13045-017-0508-x), 2017-07-11
Supplement: 13045_2017_508_MOESM1_ESM.pdf [file 13045_2017_508_MOESM1_ESM.pdf]

## **Supplementary Material and Methods**

### **Mouse cobblestone-area-forming cell assay**

OP9 cells, a mouse marrow stromal cell line, were harvested 1 day prior to experiments using standard trypsinization protocol and treated with 10 mg/mL mitomycin C for 2 hours to inhibit proliferation. Then OP9 cells were seeded in 6-well plates and reached 100% confluent. On the day of the experiment, equal number of *Asx1*<sup>tm/+</sup> and wild-type bone marrow cells were seeded on OP-9 stromal layer cells. After 1 week, colonies growing underneath the stromal layer were counted on an inverted microscope.

### **Colony-forming cell assay**

In the initial plating, bulk bone marrow cells were plated in MethoCult™ GF M3434 (Stemcell technologies, BC, Canada) on 35mm culture dish according to user manual and the seeding concentration was 5000 cells per dish. After culture for 1 week, each type of colony was identified and counted, then MethoCult™ were dissolved by 4 times volume of complete IMDM medium and cells were harvested by regular centrifugation. Seeding concentration of second plating was 5000 cells per dish and colonies were cultured for 1 week before identification and colony counting. Colonies were harvested as previously described and seeding concentration for third plating was 3000 cells per dish. Colonies of third plating were identified and counted after another 1-week culture period.

### **Long term culture-initiating cell (LTC-IC) assay**

Mouse bone marrow cells were seeded on the OP9 stromal layer in 3-fold dilution from 1215 to 5 cells per well in a 96-well plate, each with 10-20 replicates. Bone marrow cells and stromal layers were cultured in M5300 medium with 10<sup>-6</sup> M hydrocortisone (both from Stemcell Technologies, BC, Canada) and half of the medium was replaced with fresh medium every week for 5 weeks. Subsequently, all medium was replaced with MethoCult™ GF M3434 (Stemcell technologies, BC, Canada). Number of wells which had colonies were scored and long term culture-initiating cell frequency were calculated by L-Calc software (Stemcell technologies, BC, Canada).

### **Mouse bone marrow transplantation and competitive repopulating unit assay (CRU)**

Nucleated mouse bone marrow cells isolated from wild-type and *Asx1* knock-in mice were used for bone marrow transplantation. B6.SJL-Ptprc<sup>a</sup>pepc<sup>b</sup>/BoyJ (CD45.1) recipient mice were lethally irradiated and then donor cells (CD45.2) were administered by retro-orbital injection within 24 hours. Peripheral blood was collected and the population size of CD45.1 and CD45.2 peripheral blood cells were analyzed to evaluate the reconstitution of the hematopoietic system every 4 weeks.

In competitive repopulating unit assay, a fixed number of CD45.1 whole bone marrow cells were used as helper cells and CD45.2 *Asx1* knock-in or wild-type Lin<sup>-</sup>Sca-1<sup>+</sup>c-Kit<sup>+</sup> (LSK) bone marrow cells were used as the test cells. Test cells were mixed with CD45.1 helper cells and transplanted into lethally irradiated CD45.1 recipient. Peripheral blood was collected and the population size of CD45.1 and CD45.2 cells in peripheral blood were analyzed every 4 weeks. Recipients were sacrificed 16 weeks after transplantation and the frequency of CD45.2<sup>+</sup> HSPCs in bone marrow were evaluated by flow cytometry.

#### **FACS analysis and Cell sorting**

For FACS analysis, single cell suspension from either cultured cells or mouse hematopoietic organs (bone marrow or spleen) were stained with FITC, APC or PE-labeled anti-mouse monoclonal antibodies. The population size of long-term hematopoietic stem cells (Lin<sup>-</sup>Sca-1<sup>+</sup>c-Kit<sup>+</sup>CD150<sup>+</sup>CD48<sup>-</sup>), short-term hematopoietic stem cells (Lin<sup>-</sup>Sca-1<sup>+</sup>c-Kit<sup>+</sup>CD150<sup>+</sup>CD48<sup>+</sup>), multipotent progenitors (Lin<sup>-</sup>Sca-1<sup>+</sup>c-Kit<sup>+</sup>CD150<sup>-</sup>CD48<sup>+</sup>), common myeloid progenitors (Lin<sup>-</sup>Sca-1<sup>-</sup>c-Kit<sup>+</sup>CD34<sup>+</sup>FcγR<sup>lo</sup>), granulocyte-monocytic progenitors (Lin<sup>-</sup>Sca-1<sup>-</sup>c-Kit<sup>+</sup>CD34<sup>+</sup>FcγR<sup>hi</sup>), and megakaryocyte-erythroid progenitors (Lin<sup>-</sup>Sca-1<sup>-</sup>c-Kit<sup>+</sup>CD34<sup>+</sup>FcγR<sup>lo</sup>) were acquired on BD LSRFortessa, BD FACSAriaIII or BD FACSVerse. For cell sorting, desired mouse bone marrow cells were sorted using a BD FACSAriaIII multicolor cell sorter. Data were analyzed using FlowJo™ software (FlowJo, Ashland, OR).

#### **Retroviral transduction of *MN1***

Retrovirus carrying *MN1* gene was generated by transient transfection of Plat-E retroviral packaging cell line (Cell Biolabs, San Diego, CA). Three days after transfection, the retrovirus was harvested by collecting conditioned medium of Plat-E cells. The conditioned medium was filtered through 0.22 μm syringe filter and concentrated via Amicon Ultra-15 Centrifugal Filter Units, then the virus concentrate was applied to the mouse bone marrow cultured in StemSpan SFEM (Stemcell technologies, BC, Canada) complete medium with 5 μg/mL protamine sulfate, 20 ng/mL recombinant mouse SCF, 10 ng/mL recombinant mouse IL-3 and 20 ng/mL recombinant mouse IL-6. After 72 hours, Lin<sup>-</sup> vital cells with green fluorescence (GFP<sup>+</sup>) were sorted for further experiments.

#### **Microarray analysis**

Mouse bone marrow cells were harvested from mice between 8-12 weeks old. Lin<sup>-</sup> bone marrow cells were sorted for RNA extraction. Gene expression profiling was performed using Affymetrix Mouse Transcriptome Array 1.0 (Affymetrix, Santa Clara, CA) or Mouse Ref-8 BeadChip (Illumina, San Diego, CA). All microarray data were quantile normalized to eliminate inter-sample biases. Paired and unpaired two-

sample Student's *t*-tests were used to assess the differences between samples with and without *Asx1* mutations;  $p < 0.05$  was set as threshold for significance. In order to investigate the functional relevance of *ASXL1* mutation, we used the Gene Set Enrichment Analysis (GSEA) software to analyze the enrichment of KEGG pathways, Gene Ontologies, oncogenic signatures, and immunologic signatures in the global gene expression profiles. Briefly, all genes were ranked according to their significance assessed by *t*-tests, with two ends representing the most significantly up-regulated genes in samples with mutant and wild-type *ASXL1*, respectively, and tested for overrepresentation of member genes of a gene set at either side of the list. Significance of overrepresentation was assessed against random permutations with respect to genes.

### **Histone extraction and western hybridization**

Histone of either *Asx1<sup>tm/+</sup>* and wild-type mouse bulk bone marrow cells were extracted by histone extraction kit according to user manual (Abcam, UK) and then standard western hybridization was performed subsequently for immunostaining. Anti-H3K27me3 (Genetex, USA) was used to determine H3K27me3 amount and anti-Histone H3 (Upstate, Germany) was used to detect total histone H3 as internal control.

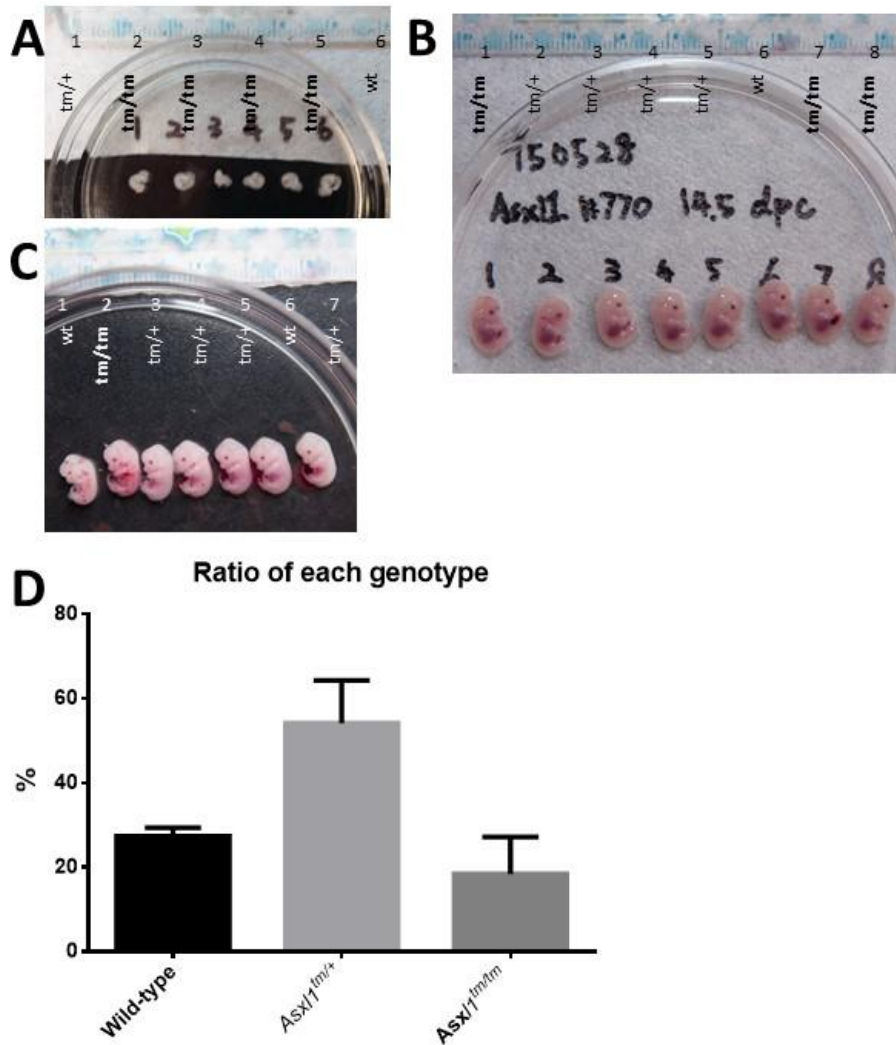

**Supplementary figure S1.** Genotype of newborn mice under heterozygous mate heterozygous breeding plane. (A) Genotype of each pup at 10.5 dpc. (B) & (C) Genotype of each pup at 14.5 dpc. (D) Ratio of each genotype after delivery (N=22 in 3 litters).

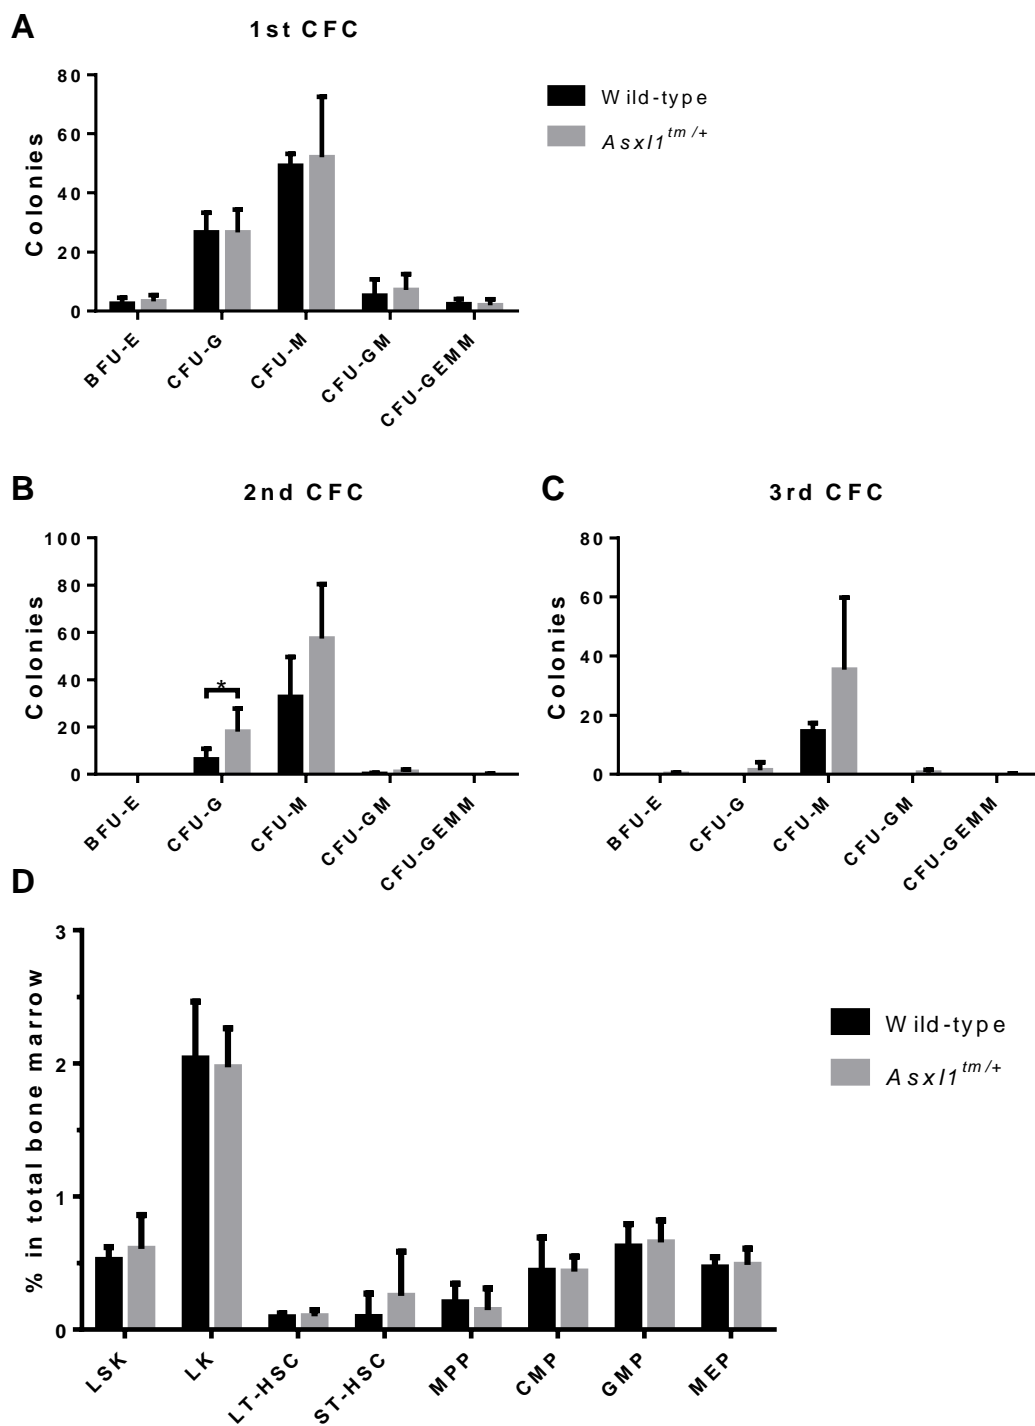

**Supplementary figure S2.** Detail results of colony assay and population frequency of hematopoietic stem cells and progenitors in bone marrow. (A) Number of each colony type at the first CFC assay. (B) Number of each colony type at the second CFC assay. (C) Number of each colony type at the third CFC assay. (D) Frequency of hematopoietic stem cells and progenitors in *Asx11<sup>tm/+</sup>* and wild-type mice bone

marrow.

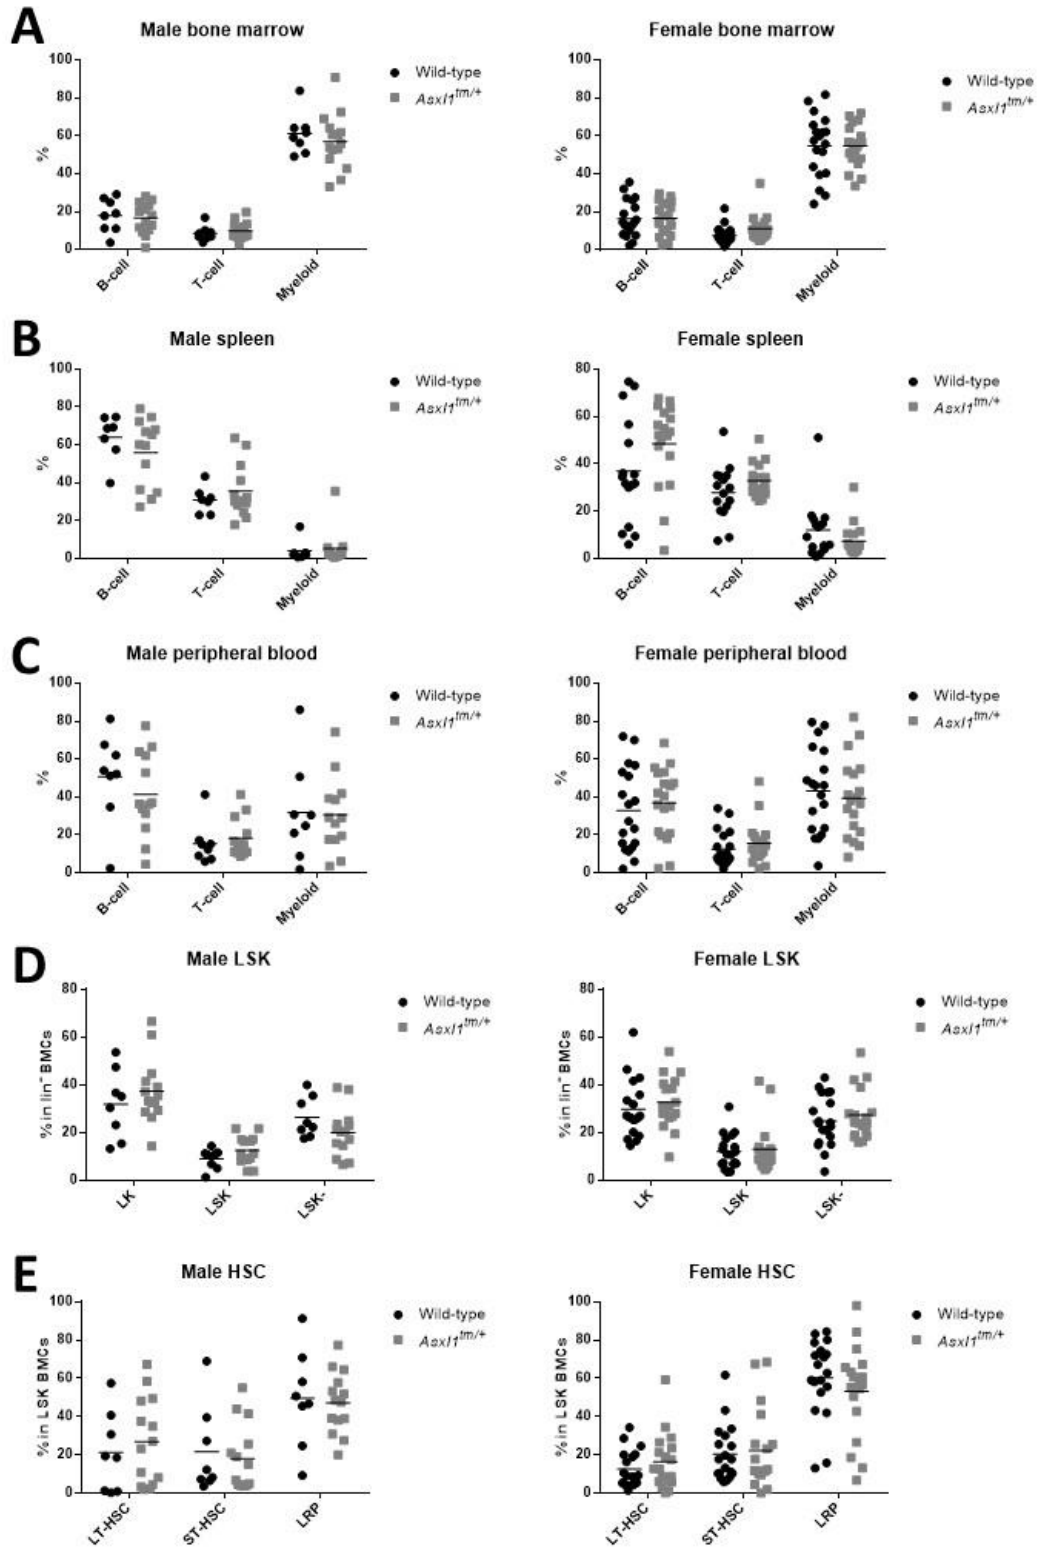

**Supplementary figure S3.** FACS analysis of old *Asx1<sup>tm/+</sup>* and wild-type mice's bone marrow cells (BMCs), spleen cells and peripheral blood cells. (A) Proportion of B-cell, T-cell and myeloid in old mice's bone marrow (Right panel: female mice; left panel: male mice). (B) Proportion of B-cell, T-cell and myeloid in old mice's spleen

(Right panel: female mice; left panel: male mice). (C) Proportion of B-cell, T-cell and myeloid in old mice's peripheral blood (Right panel: female mice; left panel: male mice). (D) Composition of HSPC in old mice's bone marrow (Right panel: female mice; left panel: male mice). (E) Composition of HSC in old mice's bone marrow (Right panel: female mice; left panel: male mice).



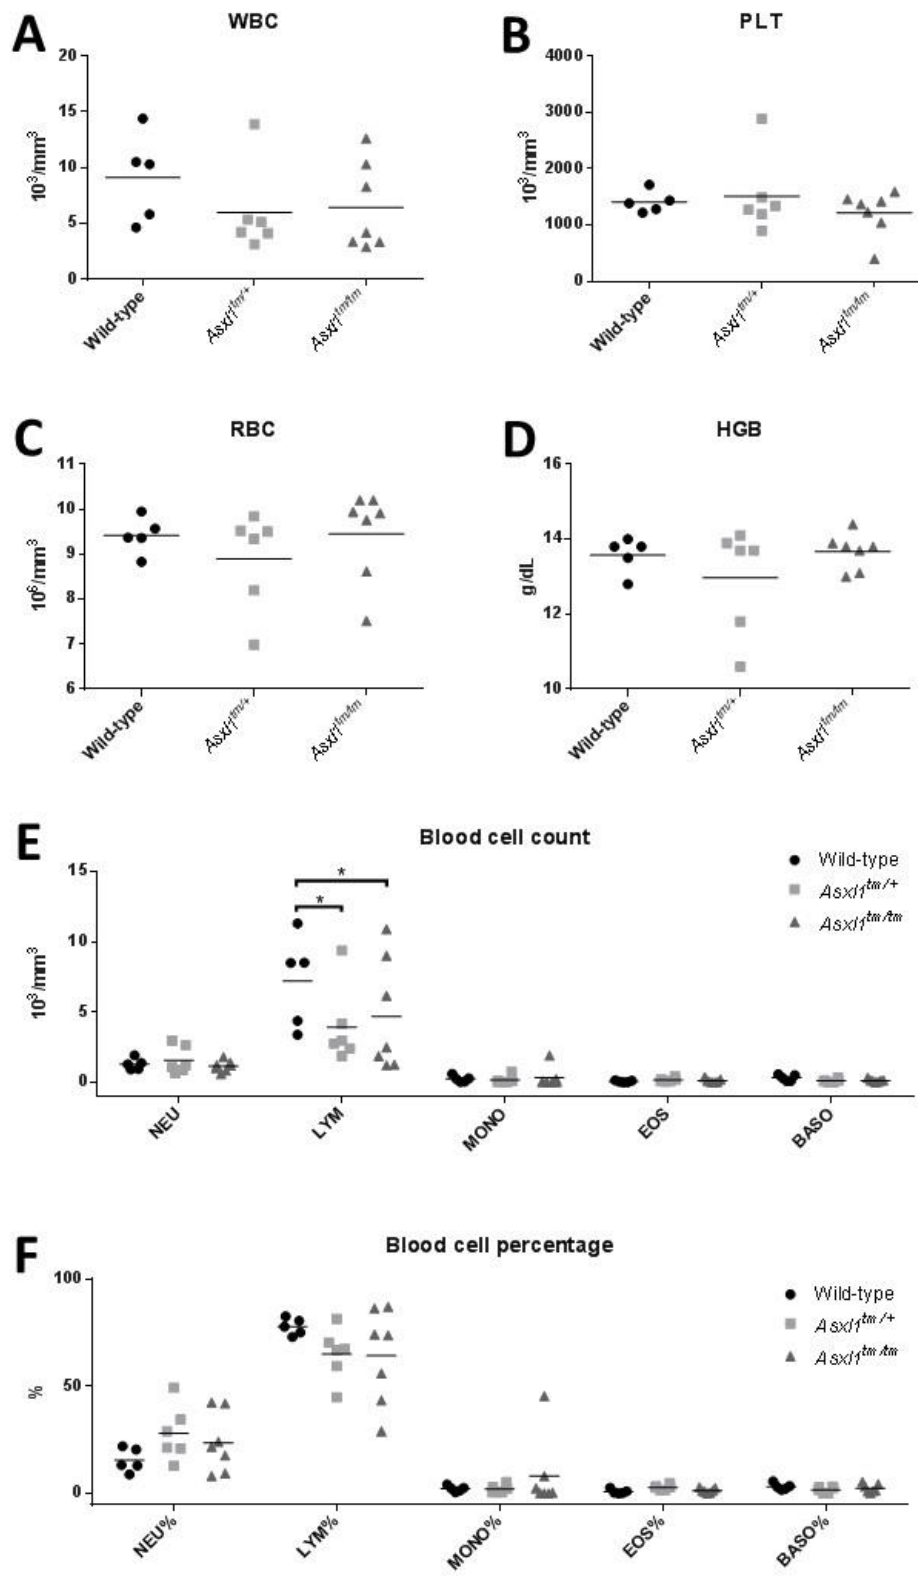

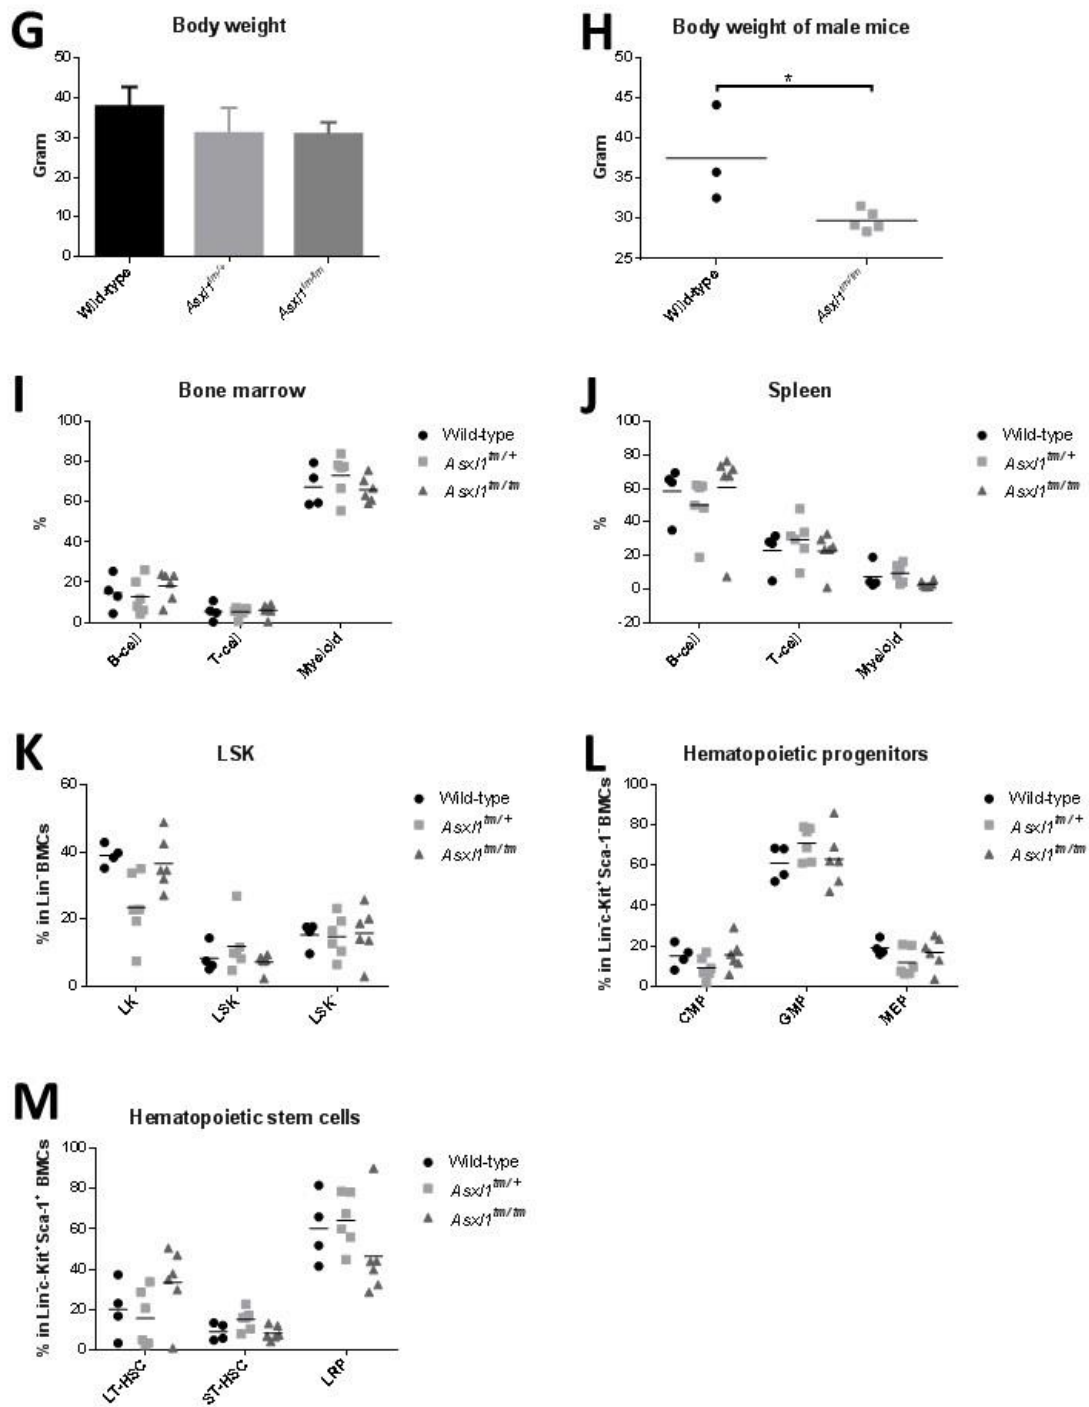

**Supplementary figure S4.** Hemogram of old *Asx1<sup>tm/tm</sup>* mice cohort. (A) White blood cell counts of 3 genotypes (Wild-type N=5, *Asx1<sup>tm/+</sup>* N=6, *Asx1<sup>tm/tm</sup>* N=7). (B) Platelet counts of 3 genotypes (Wild-type N=5, *Asx1<sup>tm/+</sup>* N=6, *Asx1<sup>tm/tm</sup>* N=7). (C) Red blood cell counts of 3 genotypes (Wild-type N=5, *Asx1<sup>tm/+</sup>* N=6, *Asx1<sup>tm/tm</sup>* N=7). (D) Hemoglobin value of 3 genotypes (Wild-type N=5, *Asx1<sup>tm/+</sup>* N=6, *Asx1<sup>tm/tm</sup>* N=7). (E) and (F) Neutrophil, lymphoid, monocyte, eosinophil and basophil counts and

percentages of 3 genotypes (Wild-type N=5, *Asx1<sup>tm/+</sup>* N=6, *Asx1<sup>tm/tm</sup>* N=7). (G) Average body weight of every mouse in this cohort (Wild-type N=5, *Asx1<sup>tm/+</sup>* N=6, *Asx1<sup>tm/tm</sup>* N=7). (H) Male homozygous mice were smaller than male wild-type mice. Only male wild-type and homozygous had sufficient numbers to do statistics. (I) B-cell, T-cell and myeloid frequencies in bone marrow (Wild-type N=4, *Asx1<sup>tm/+</sup>* N=6, *Asx1<sup>tm/tm</sup>* N=6). (J) B-cell, T-cell and myeloid frequencies in spleen (Wild-type N=4, *Asx1<sup>tm/+</sup>* N=6, *Asx1<sup>tm/tm</sup>* N=6). (K) Frequencies of hematopoietic precursors in Lin<sup>-</sup> bone marrow cells (Wild-type N=4, *Asx1<sup>tm/+</sup>* N=6, *Asx1<sup>tm/tm</sup>* N=6). (L) Frequencies of hematopoietic progenitors in Lin<sup>-</sup>c-Kit<sup>+</sup>Sca-1<sup>-</sup> bone marrow cells (Wild-type N=4, *Asx1<sup>tm/+</sup>* N=6, *Asx1<sup>tm/tm</sup>* N=6). (M) Frequencies of hematopoietic stem cells in Lin<sup>-</sup>c-Kit<sup>+</sup>Sca-1<sup>+</sup> bone marrow cells (Wild-type N=4, *Asx1<sup>tm/+</sup>* N=6, *Asx1<sup>tm/tm</sup>* N=6).

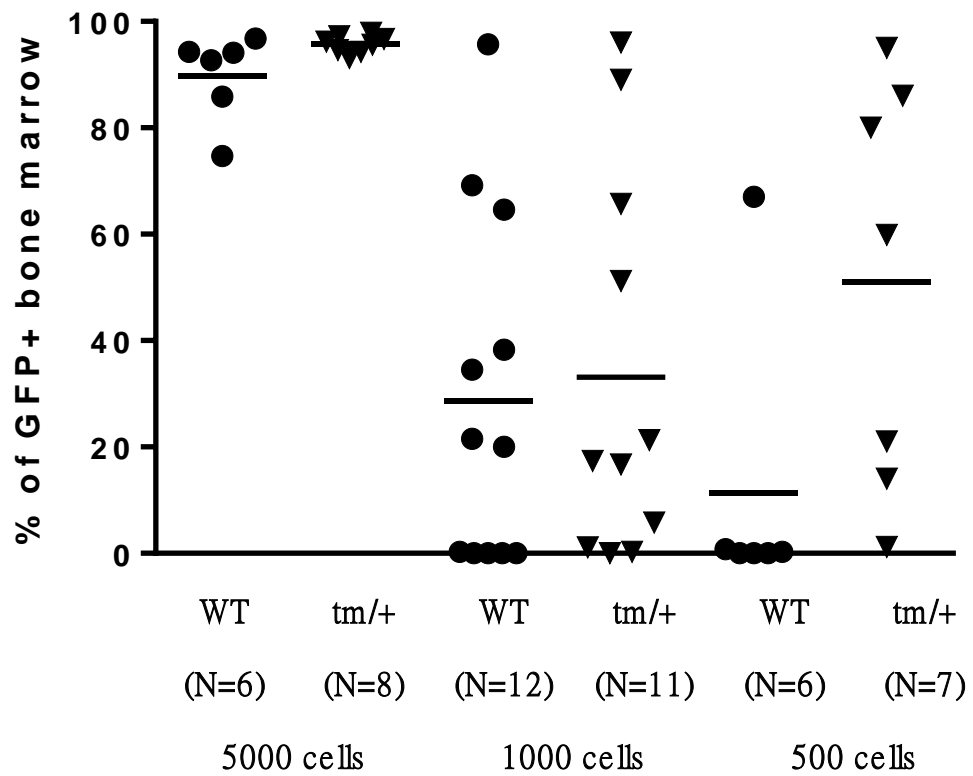

**Supplementary figure S5.** Serial dilution transplantation assays showed that while transduced by *MN1*, higher proportion of *Asx1<sup>tm/+</sup>* bone marrow cells carried engraftment ability compared to the wild-type controls (WT=wild-type and tm/+=*Asx1<sup>tm/+</sup>*).

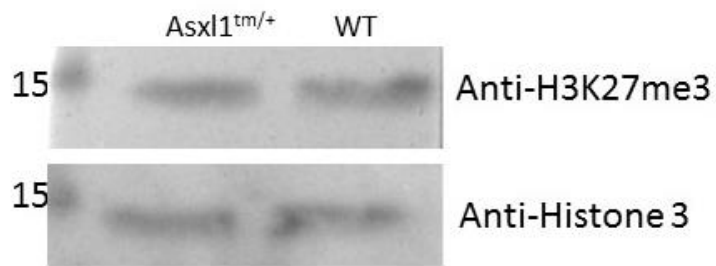

**Supplementary figure S6.** *Asxl1<sup>tm/+</sup>* did not significantly alter global H3K27me3 level in bulk bone marrow cells.

**Supplementary Table S1.** Lists of H3K27m3 peaks-associated genes with concordant downregulation.

| <b><i>Asx1</i> wild-type specific H3K27me3 peaks with concordant downregulation in <i>Asx1</i> wild-type cells (118 genes)</b> |         |          |          | <b><i>Asx1</i> mutant specific H3K27me3 peaks with concordant downregulation in <i>Asx1</i> mutant cells (112 genes)</b> |          |            |            |
|--------------------------------------------------------------------------------------------------------------------------------|---------|----------|----------|--------------------------------------------------------------------------------------------------------------------------|----------|------------|------------|
| 1200007C13RIK                                                                                                                  | DAPL1   | LRFN5    | SAMD4    | 1700036G14RIK                                                                                                            | GM13746  | MDGA1      | SERPINB1B  |
| 1700016D06RIK                                                                                                                  | DGKK    | LY6F     | SEC16B   | 1700066B19RIK                                                                                                            | GM13807  | MED12L     | SERPINH1   |
| 3300002I08RIK                                                                                                                  | DMD     | MAP3K15  | SEMA4A   | 1700112J16RIK                                                                                                            | GM14110  | MKRN3      | SLC41A2    |
| 4632411P08RIK                                                                                                                  | DUSP9   | ME1      | SETBP1   | 1700113H08RIK                                                                                                            | GM14319  | MOB1B      | SMT3H2-PS4 |
| 4930407I10RIK                                                                                                                  | ECE1    | MMP25    | SH2D1B1  | 4933402D24RIK                                                                                                            | GM15458  | N-R5S12    | STK36      |
| 4930432B10RIK                                                                                                                  | EFCAB6  | MPPED1   | SLC16A5  | ABCA1                                                                                                                    | GM16581  | NEB        | SYT4       |
| 4930471D02RIK                                                                                                                  | EPHA10  | MYH1     | SLC29A4  | ADAM5                                                                                                                    | GM22069  | NR1H4      | TBC1D21    |
| 4932411E22RIK                                                                                                                  | FABP4   | MYO16    | SLC45A1  | AGTPBP1                                                                                                                  | GM23175  | NRCAM      | TBPL2      |
| 4933436E23RIK                                                                                                                  | FKBP9   | NCAM1    | SLC4A10  | APOH                                                                                                                     | GM23816  | OLFR1      | TCL1B3     |
| 9530085P06RIK                                                                                                                  | FLG     | NHSL1    | SLC7A2   | AW495222                                                                                                                 | GM24601  | OSBPL6     | TMED6      |
| 9830107B12RIK                                                                                                                  | FMN1    | NPNT     | SORCS2   | AY512915                                                                                                                 | GM24981  | PAMR1      | TMEM130    |
| A230107N01RIK                                                                                                                  | FSIP2   | OLFR53   | SPATS2L  | CACNA2D2                                                                                                                 | GM6117   | PBX1       | TRIM66     |
| A830019P07RIK                                                                                                                  | GAS7    | OLFR553  | SQRDL    | CCDC27                                                                                                                   | GM7237   | PBX3       | TRIM71     |
| ACAN                                                                                                                           | GM10650 | OLFR685  | SRRM4OS  | CCR4                                                                                                                     | GM7420   | PDE4DIP    | U90926     |
| AMPH                                                                                                                           | GM13307 | PDE1A    | STOX2    | CHIA1                                                                                                                    | GPR174   | PIK3C2G    | UGGT2      |
| ANPEP                                                                                                                          | GM15433 | PELI2    | SV2B     | CHN1OS3                                                                                                                  | GSE1     | PLEKHS1    | ULK4       |
| AOX1                                                                                                                           | GM16511 | PGAP1    | SYTL2    | CSGALNACT1                                                                                                               | HAPLN3   | POSTN      | VWA2       |
| ATP1B4                                                                                                                         | GM22152 | PLCB1    | TAGLN    | CXCL11                                                                                                                   | HGFAC    | PPP3R1     | VWA3B      |
| AY512931                                                                                                                       | GM22284 | PPIC     | TGFBI    | DHRS7C                                                                                                                   | HIST1H1B | PRSS12     | ZBTB8B     |
| BCKDHB                                                                                                                         | GM25216 | PPM1A    | TMEM132C | DNAH17                                                                                                                   | IL13RA1  | PRSS43     | ZC3H12B    |
| BMX                                                                                                                            | GM26395 | PRAP1    | TMEM233  | DNAH8                                                                                                                    | IL1A     | PTOV1      | ZFP112     |
| C1QTNF1                                                                                                                        | GM3248  | PRM1     | TRIM2    | DRP2                                                                                                                     | IQSEC3   | RAB37      | ZFP385B    |
| CAPS2                                                                                                                          | GM3558  | PTPRM    | TRPC1    | ELFN1                                                                                                                    | KCNIP1   | RAB3GAP2   |            |
| CCDC60                                                                                                                         | GM7073  | PXDC1    | USP51    | FAM160A2                                                                                                                 | KCNK6    | RAI2       |            |
| CCDC85B                                                                                                                        | GM94    | RDH18-PS | VSNL1    | FAM81A                                                                                                                   | KCNU1    | RHOX2D     |            |
| CCL27A                                                                                                                         | GPRIN2  | RET      | WDR93    | FGF5                                                                                                                     | L3MBTL4  | RNLS       |            |
| CDKL4                                                                                                                          | IL3     | RGS20    | ZDHHC2   | FSCN1                                                                                                                    | LIN28B   | RORA       |            |
| CTNND2                                                                                                                         | ILDR1   | RHOD     | ZFP641   | GM11770                                                                                                                  | LINGO2   | ROS1       |            |
| CYP2C70                                                                                                                        | INADL   | RIAN     |          | GM12153                                                                                                                  | LIPO1    | RPL31-PS17 |            |
| D930032P07RIK                                                                                                                  | LGR4    | RNF182   |          | GM13417                                                                                                                  | MAP3K12  | S100A3     |            |
